# Supplementary material for: New ferrocenyl-containing organic hole-transporting materials for perovskite solar cells in regular (n-i-p) and inverted (p-i-n) architectures
Source: Royal Society of Chemistry journal article supplement (doi:10.1039/c8ra08946a), 2019-01-01
Supplement: c8ra08946a1.pdf [file c8ra08946a1.pdf]

*Supporting Information*

**New ferrocenyl-containing organic hole-transporting materials for perovskite solar cells in regular (n-i-p) and inverted (p-i-n) architectures**

Jingwen Jia, Liangsheng Duan, Yu Chen\*, Xueping Zong, Zhe Sun, Quanping Wu, Song Xue\*

*Tianjin Key Laboratory of Organic Solar Cells and Photochemical Conversion, School of Chemistry & Chemical Engineering, Tianjin University of Technology, Tianjin 300384, PR China*

*\*Corresponding authors. E-mail addresses: cytjut@163.com (Y. Chen),*

*xuesong@ustc.edu.cn (S. Xue).*

## Table of Contents

|                                                                                                                              |        |
|------------------------------------------------------------------------------------------------------------------------------|--------|
| Characterization details for the synthesis of <b>JW6</b> , <b>JW7</b> and <b>JW8</b> .....                                   | S3     |
| The optimized structures of <b>JW6</b> , <b>JW7</b> and <b>JW8</b> .....                                                     | S4     |
| Representative bond lengths and dihedral angles of optimized structures of <b>JW6</b> ,<br><b>JW7</b> and <b>JW8</b> .....   | S5     |
| The photovoltaic parameters from eight cells of p-i-n type PSCs fabricated by<br><b>JW7</b> .....                            | S6     |
| The photovoltaic parameters of hysteresis test for p-i-n type PSCs with various<br>HTMs.....                                 | S7     |
| J-V plots of p-i-n type PSCs based on <b>JW7</b> measured through reverse and forward<br>bias at a scan rate of 0.1V/s. .... | S8     |
| <sup>1</sup> H NMR and <sup>13</sup> C NMR spectra of <b>JW6</b> , <b>JW7</b> and <b>JW8</b> .....                           | S9-S11 |

### Characterization details for the synthesis of JW6, JW7 and JW8

**JW6**, orange solid (63.2% yield).  $^1\text{H}$  NMR (400 MHz,  $\text{CDCl}_3$ )  $\delta$  7.44-7.39 (m, 8H), 7.30 (t,  $J = 7.8$  Hz, 4H), 7.15 (d,  $J = 7.8$  Hz, 4H), 7.12 (s, 2H), 7.08 (d,  $J = 8.6$  Hz, 8H), 7.02-6.98 (m, 2H), 4.53 (s, 4H), 4.28 (s, 14H).  $^{13}\text{C}$  NMR (101 MHz,  $\text{CDCl}_3$ )  $\delta$  147.58, 146.55, 132.45, 129.92, 129.69, 129.28, 127.24, 124.57, 124.17, 123.72, 123.02, 122.91, 118.12, 87.82, 85.66, 71.34, 69.96, 68.74, 65.59. HRMS (ESI) (m/z):  $[\text{M}]^+$  calcd. For  $\text{C}_{62}\text{H}_{46}\text{N}_2\text{Fe}_2$ , 931.2360; found: 931.2441.

**JW7**, orange solid (51.0% yield).  $^1\text{H}$  NMR (400 MHz,  $\text{CDCl}_3$ )  $\delta$  7.41-7.33 (m, 6H), 7.29 (d,  $J = 8.5$  Hz, 4H), 7.18 (d,  $J = 8.5$  Hz, 2H), 7.03 (d,  $J = 8.6$  Hz, 4H), 6.92 (d,  $J = 8.7$  Hz, 2H), 6.89 (d,  $J = 6.3$  Hz, 2H), 6.87 (d,  $J = 6.5$  Hz, 2H), 4.51 (s, 4H), 4.27 (s, 14H), 3.87 (s, 3H), 3.84 (s, 3H).  $^{13}\text{C}$  NMR (100 MHz,  $\text{CDCl}_3$ )  $\delta$  159.22, 146.53, 144.96, 136.47, 132.40, 131.42, 130.35, 128.65, 125.48, 123.9, 123.72, 118.16, 114.17, 113.62, 87.80, 85.69, 71.34, 69.95, 68.71, 65.66, 55.23. HRMS (ESI) (m/z):  $[\text{M}]^+$  calcd. For  $\text{C}_{58}\text{H}_{46}\text{NO}_2\text{Fe}_2$ , 900.4129; found: 900.4230.

**JW8**, orange solid (59.3% yield).  $^1\text{H}$  NMR (400 MHz,  $\text{CDCl}_3$ )  $\delta$  7.42-7.37 (m, 6H), 7.26 (d,  $J = 8.5$  Hz, 2H), 7.13 (d,  $J = 8.5$  Hz, 2H), 7.02 (d,  $J = 8.4$  Hz, 4H), 7.00 (d,  $J = 8.5$  Hz, 2H), 6.88 (d,  $J = 8.4$  Hz, 2H), 6.74-6.69 (m, 3H), 4.51 (s, 4H), 4.26 (s, 14H), 3.01 (s, 6H), 2.99 (s, 6H).  $^{13}\text{C}$  NMR (100 MHz,  $\text{CDCl}_3$ )  $\delta$  146.61, 144.23, 142.04, 132.34, 131.14, 130.93, 130.15, 128.86, 128.52, 124.17, 123.53, 117.77, 112.38, 112.03, 87.63, 85.73, 71.32, 69.95, 68.71, 65.65, 40.50. HRMS (ESI) (m/z):  $[\text{M}]^+$  calcd. For  $\text{C}_{60}\text{H}_{51}\text{N}_3\text{Fe}_2$ , 926.2782; found: 926.2863.

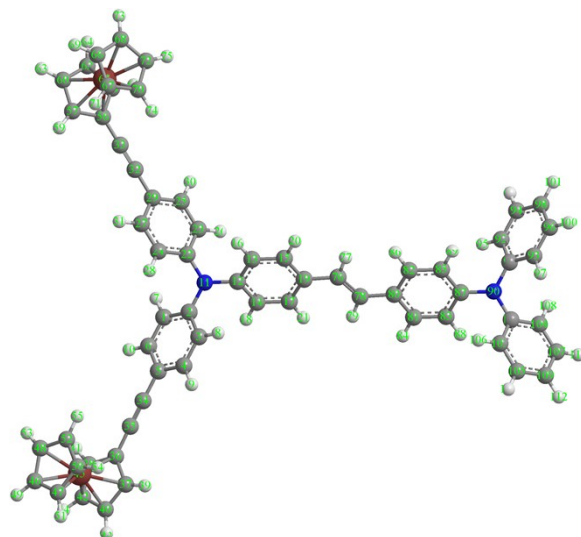

**JW6**

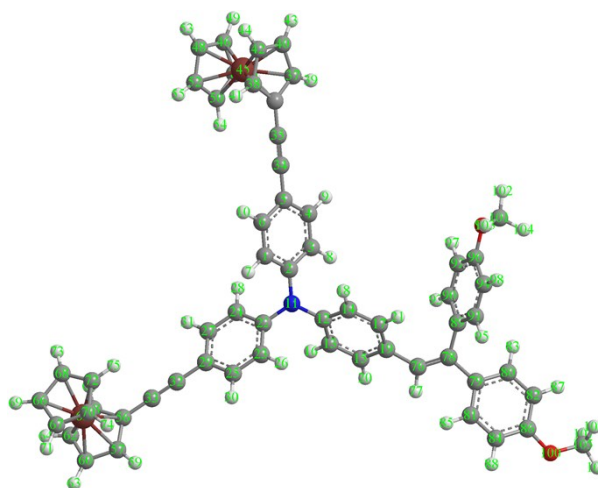

**JW7**

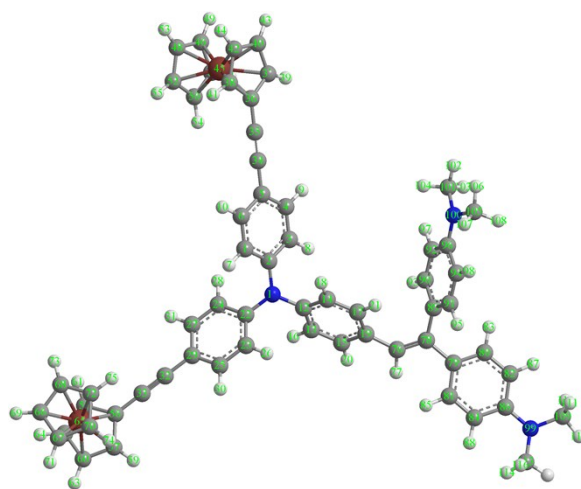

**JW8**

**Fig.S1.** The optimized structures of **JW6**, **JW7** and **JW8**.

**Table S1.** Representative bond lengths and dihedral angles of optimized structures of **JW6, JW7** and **JW8**.

| Compounds  | Bond lengths<br>(Å) |       | dihedral angles<br>(°)  |       |
|------------|---------------------|-------|-------------------------|-------|
| <b>JW6</b> | C(32)-C(29)         | 1.423 | C(23)-C(22)-N(11)-C(12) | 40.9  |
|            | C(22)-N(11)         | 1.419 | C(78)-C(76)-C(19)C(17)  | -5.1  |
|            | C(76)-C(19)         | 1.462 | C(91)-N(90)-C(87)-C(85) | -39.2 |
|            | N(90)-C(87)         | 1.417 |                         |       |
| <b>JW7</b> | C(34)-C(5)          | 1.423 | C(78)-C(76)-C(19)C(17)  | -26.9 |
|            | N(11)-C(2)          | 1.418 | C(12)-N(11)-C(2)-C(3)   | 39.4  |
|            | C(76)-C(19)         | 1.468 |                         |       |
|            | C(89)-C(78)         | 1.491 |                         |       |
| <b>JW8</b> | C(34)-C(5)          | 1.423 | C(78)-C(76)-C(19)C(17)  | -25.2 |
|            | N(11)-C(2)          | 1.416 | C(12)-N(11)-C(2)-C(3)   | 37.9  |
|            | C(76)-C(19)         | 1.467 |                         |       |
|            | C(89)-C(78)         | 1.489 |                         |       |

**Table S2.** The photovoltaic parameters from eight cells of p-i-n type PSCs fabricated by JW7.

| <b>Cell</b> | $V_{oc}$ / mV | $J_{sc}$ / mA cm <sup>-2</sup> | $FF$ | $PCE$ / % |
|-------------|---------------|--------------------------------|------|-----------|
| <b>1</b>    | 8.88          | 19.30                          | 0.62 | 10.53     |
| <b>2</b>    | 833           | 22.13                          | 0.62 | 11.43     |
| <b>3</b>    | 895           | 17.78                          | 0.63 | 10.03     |
| <b>4</b>    | 940           | 18.56                          | 0.63 | 11.00     |
| <b>5</b>    | 1050          | 18.07                          | 0.53 | 10.06     |
| <b>6</b>    | 852           | 18.30                          | 0.63 | 9.82      |
| <b>7</b>    | 810           | 20.66                          | 0.59 | 9.87      |
| <b>8</b>    | 907           | 19.49                          | 0.56 | 9.90      |

**Table S3.** The photovoltaic parameters of hysteresis test for p-i-n type PSCs with various HTMs.

|              | HTMs    | $V_{OC}$ / mV | $J_{SC}$ / mA cm <sup>-2</sup> | $FF$ | $PCE$ / % |
|--------------|---------|---------------|--------------------------------|------|-----------|
| <b>JW6</b>   | Forward | 850           | 19.73                          | 0.61 | 10.23     |
|              | Reverse | 1010          | 19.20                          | 0.53 | 10.24     |
| <b>JW7</b>   | Forward | 833           | 22.13                          | 0.62 | 11.43     |
|              | Reverse | 960           | 20.12                          | 0.53 | 10.21     |
| <b>JW8</b>   | Forward | 820           | 20.17                          | 0.63 | 10.42     |
|              | Reverse | 944           | 19.33                          | 0.50 | 9.06      |
| <b>PEDOT</b> | Forward | 867           | 22.26                          | 0.69 | 12.86     |
|              | Reverse | 860           | 22.30                          | 0.69 | 13.27     |

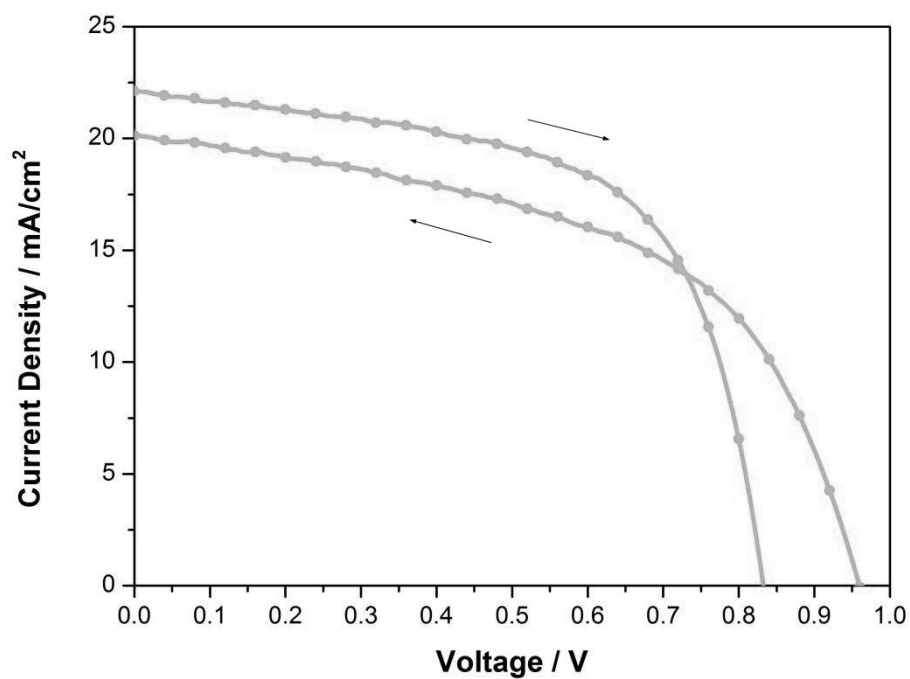

**Fig. S2.** J-V plots of p-i-n type PSCs based on **JW7** measured through reverse and forward bias at a scan rate of 0.1V/s.







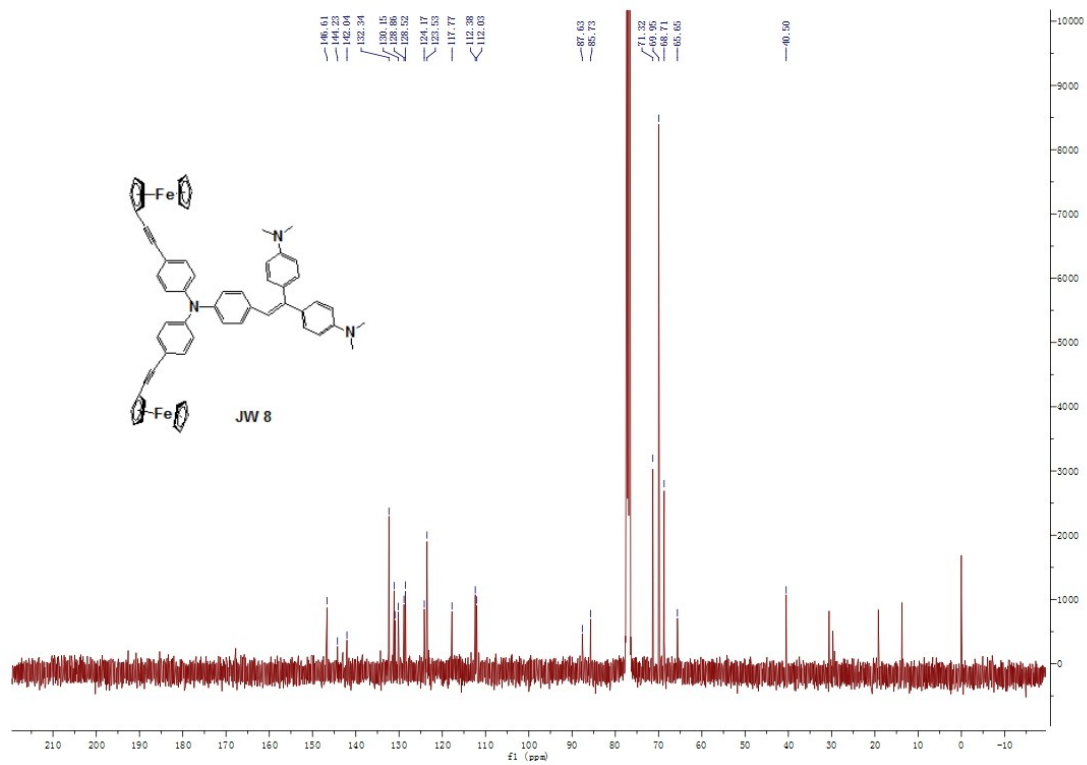

**<sup>1</sup>H NMR spectra of JW8**

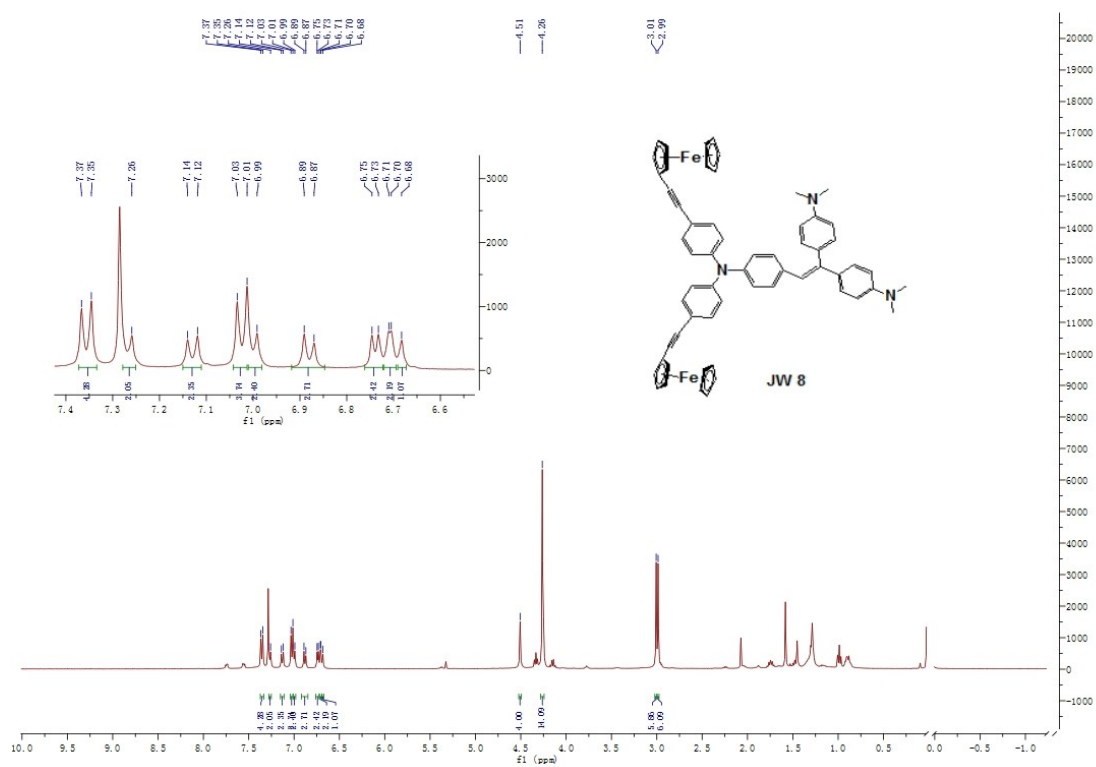

**<sup>13</sup>C NMR spectra of JW8**
